# Supplementary material for: Synthesis of different organic ammonium-based bismuth iodide perovskites for photodetection application
Source: Royal Society of Chemistry journal article supplement (doi:10.1039/d4ra00173g), 2024-01-01
Supplement: d4ra00173g1.pdf [file d4ra00173g1.pdf]

## Synthesis of Different Organic Ammonium-Based Bismuth Iodide Perovskites for Photodetection Application

Amr Elattar<sup>a</sup>, Cassie Duclos<sup>a</sup>, Franchesca Bellevu<sup>a</sup>, Tarik Dickens<sup>a</sup>, Okenwa Okoli<sup>a,b</sup>

<sup>a</sup>. *Industrial & Manufacturing Engineering, FAMU-FSU College of Engineering, 2525 Pottsdamer St., Tallahassee, Florida, 32310, USA.*

<sup>b</sup>. *Herff College of Engineering, University of Memphis, Memphis, TN, 38111, USA.*

### Supporting Figures

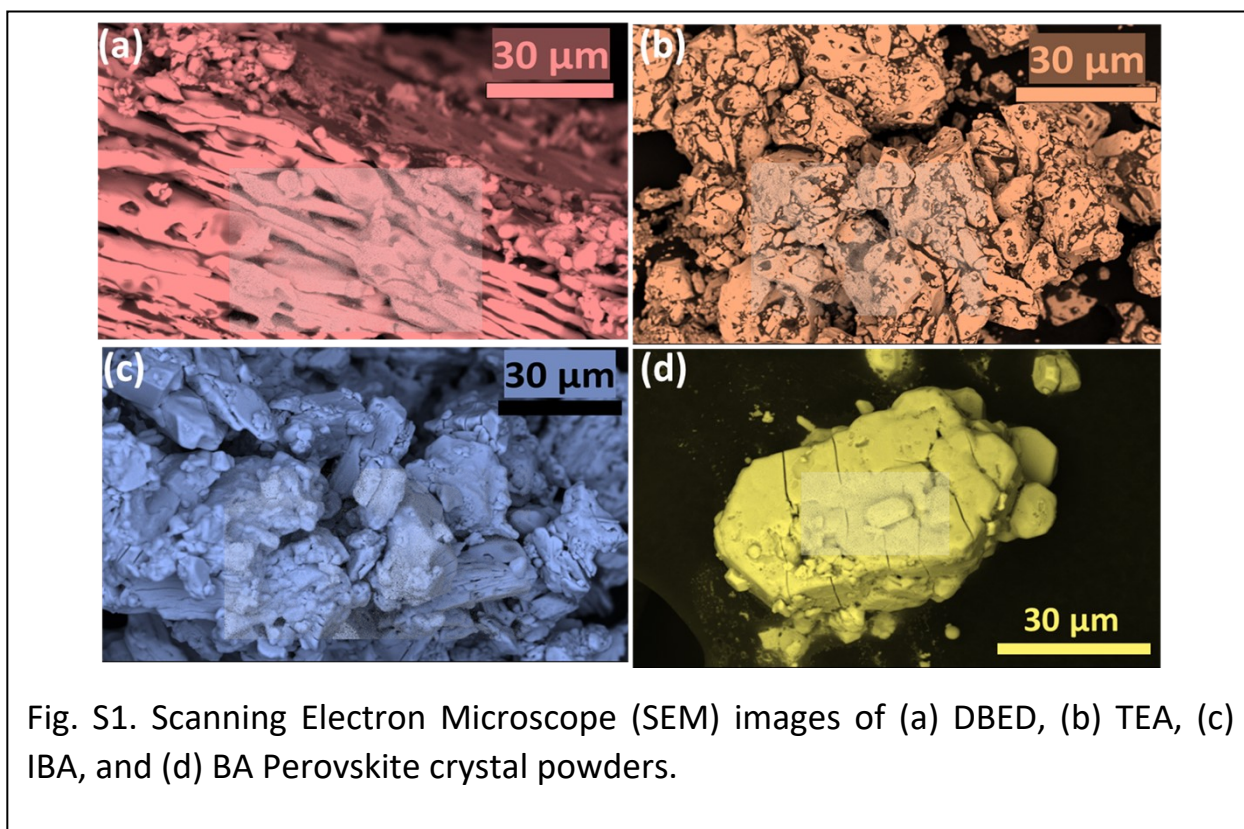

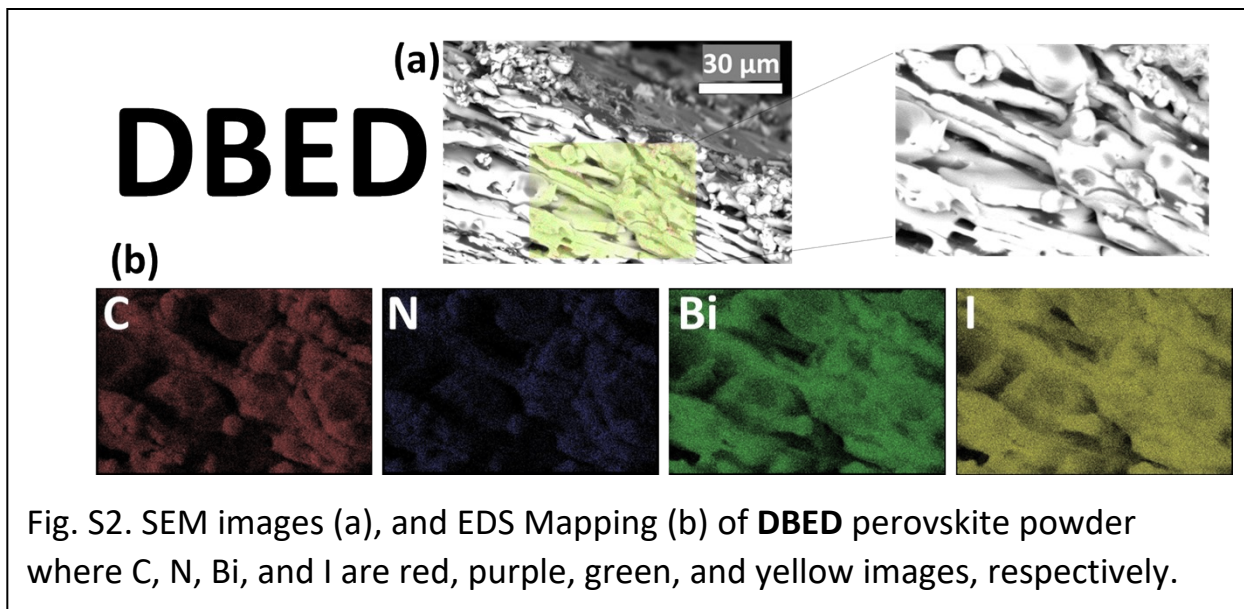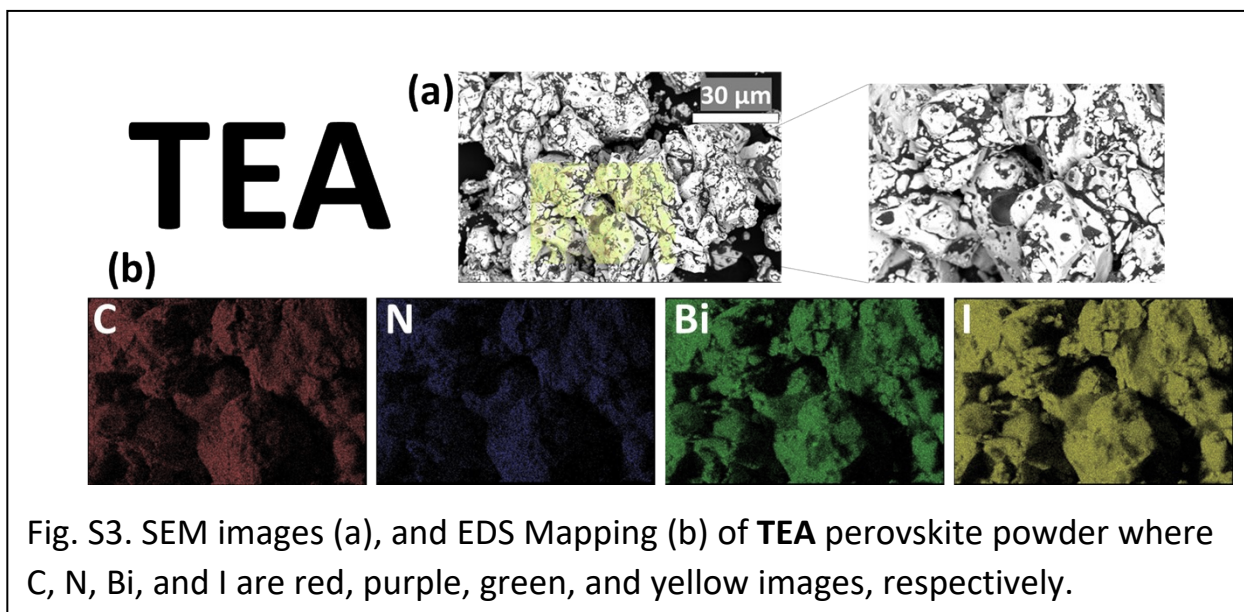

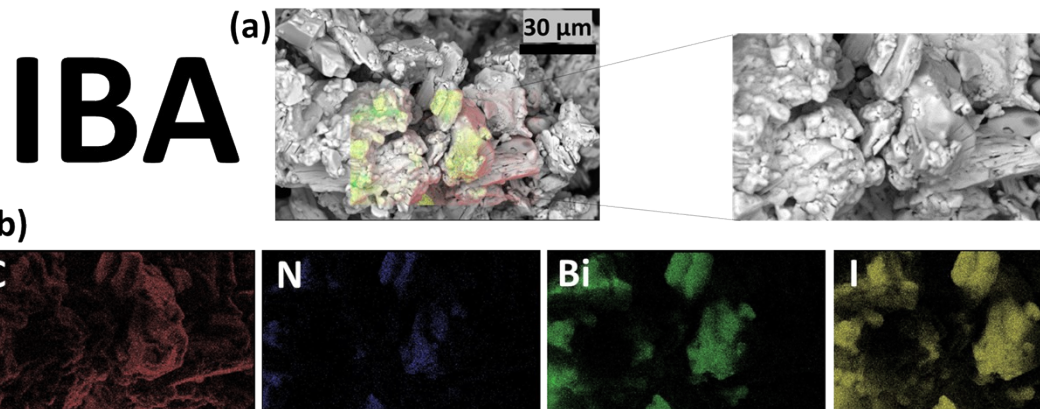

Fig. S4. SEM images (a), and EDS Mapping (b) of **IBA** perovskite powder where C, N, Bi, and I are red, purple, green, and yellow images, respectively.

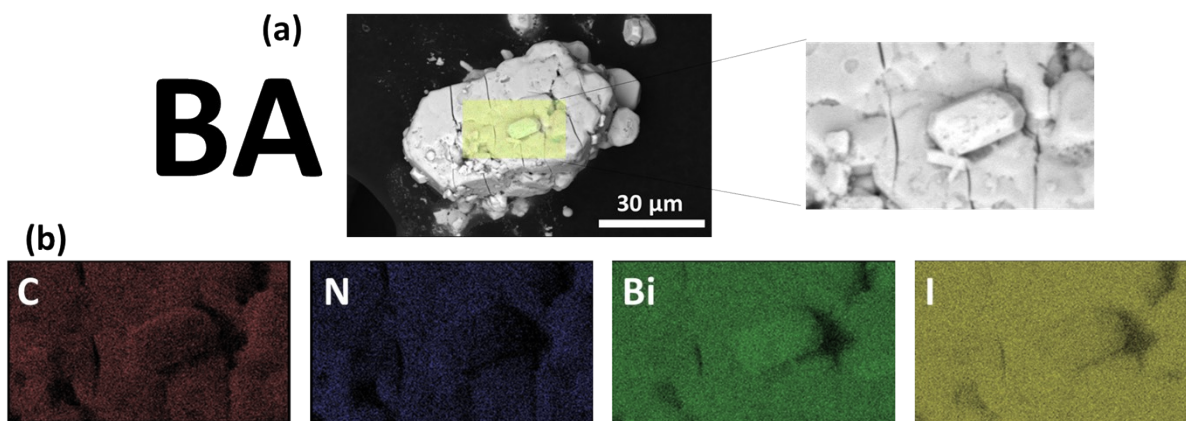

Fig. S5. SEM images (a), and EDS Mapping (b) of **BA** perovskite powder where C, N, Bi, and I are red, purple, green, and yellow images, respectively.

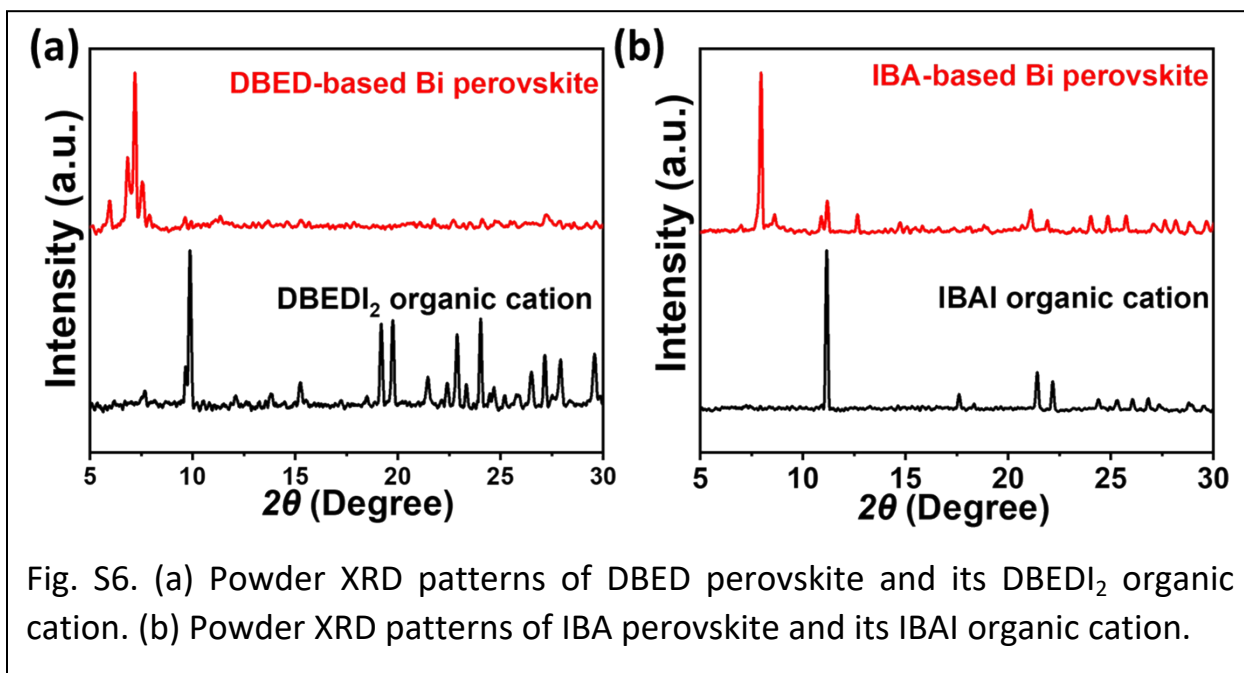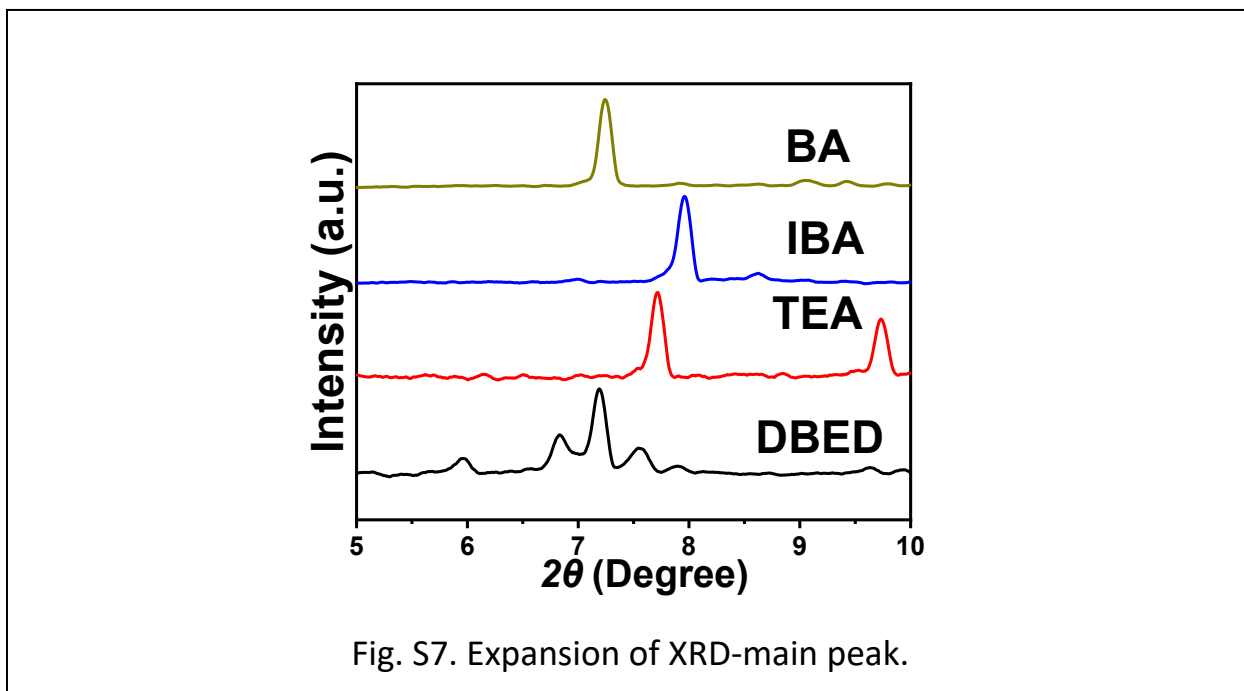

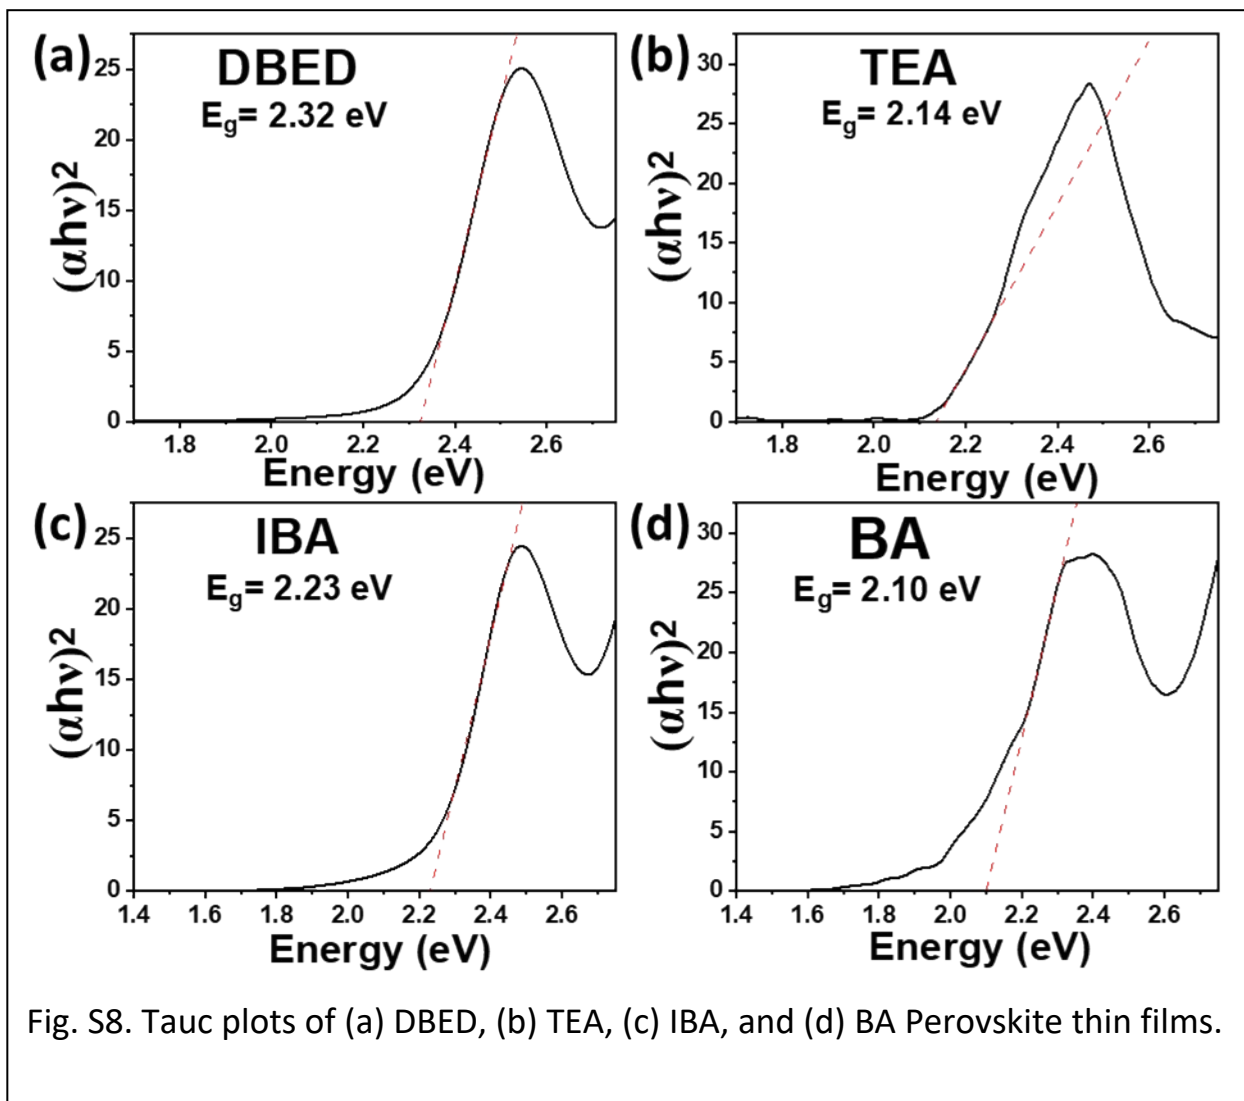

Fig. S8. Tauc plots of (a) DBED, (b) TEA, (c) IBA, and (d) BA Perovskite thin films.

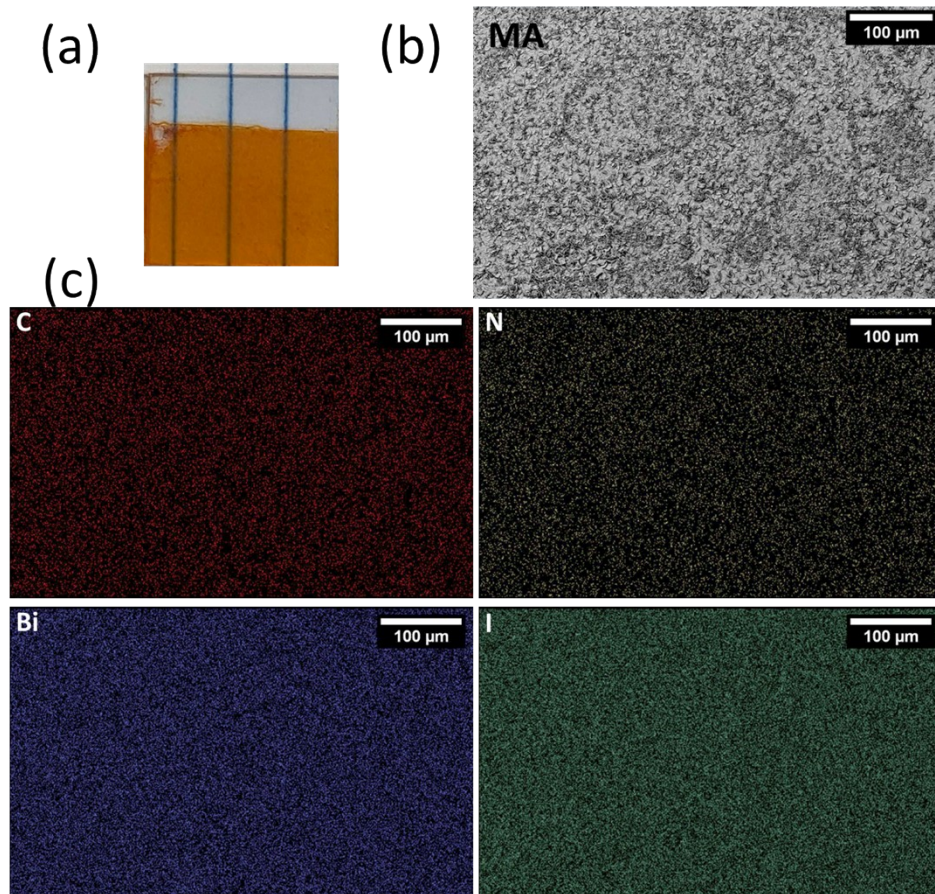

Fig. S9. Spin coated **MA** perovskite thin film (a), SEM image (b), and EDS Mapping (c) of **MA** perovskite powder where C, N, Bi, and I are red, yellow, blue, and green images, respectively.

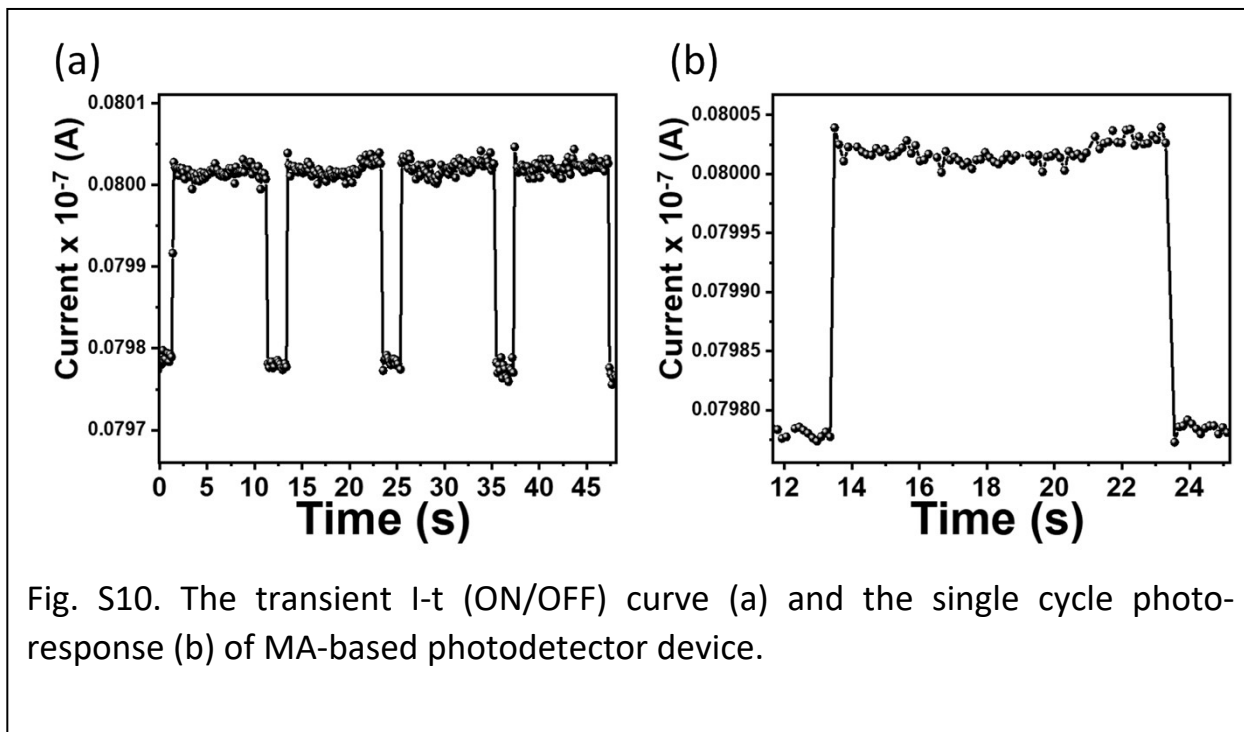

Fig. S10. The transient I-t (ON/OFF) curve (a) and the single cycle photoresponse (b) of MA-based photodetector device.

Table S1 Photodetector properties of MA Perovskite-based devices

| Perovskite PDs | Response time $\tau_{\text{rise}}$ (s) | Decay time $\tau_{\text{decay}}$ (s) | Photoresponsivity $R_{\lambda}$ (nA/W) | Photosensitivity $\xi$ | Quantum Efficiency $IQE \times 10^{-6}$ (%) | Detectivity $D^* \times 10^4$ (Jones) |
|----------------|----------------------------------------|--------------------------------------|----------------------------------------|------------------------|---------------------------------------------|---------------------------------------|
| MA             | 0.1211                                 | 0.2669                               | 0.0592                                 | 0.003154               | 0.01468                                     | 7.6339                                |

Table S2 Comparison between Organic cation-based bismuth Perovskite-based photodetector devices

| Perovskite PDs                                 | Incident light power (mW/cm <sup>2</sup> ) | Wavelength (nm) | Illuminated Area (cm <sup>2</sup> ) | Operating Voltage (V) | Response time $\tau_{\text{rise}}$ (s) | Decay time $\tau_{\text{decay}}$ (s) | Photoresponsivity $R_{\lambda}$ (A/W) | Detectivity $D^*$ (Jones) | Ref.         |
|------------------------------------------------|--------------------------------------------|-----------------|-------------------------------------|-----------------------|----------------------------------------|--------------------------------------|---------------------------------------|---------------------------|--------------|
| MA                                             | 100                                        | 450-950         | 1.25                                | 0                     | 0.1211                                 | 0.2669                               | $0.0592 \times 10^{-9}$               | $7.6339 \times 10^4$      | This work    |
| DBED                                           | 100                                        | 450-950         | 1.25                                | 0                     | 4.62                                   | 5.79                                 | $1.58 \times 10^{-9}$                 | $0.0051 \times 10^4$      | This work    |
| TEA                                            | 100                                        | 450-950         | 1.25                                | 0                     | 9.92                                   | 5.36                                 | $5.71 \times 10^{-9}$                 | $0.0015 \times 10^4$      | This work    |
| IBA                                            | 100                                        | 450-950         | 1.25                                | 0                     | 2.35                                   | 5.99                                 | $39.350 \times 10^{-9}$               | $11.6945 \times 10^4$     | This work    |
| BA                                             | 100                                        | 450-950         | 1.25                                | 0                     | 10.03                                  | 9.97                                 | $23.45 \times 10^{-9}$                | $7.2040 \times 10^4$      | This work    |
| MA <sub>3</sub> Bi <sub>2</sub> I <sub>9</sub> | 0.01                                       | 400-700         | 0.25                                | 0                     | 0.02681                                | 0.04198                              | $1.76 \times 10^{-3}$                 | $1.3 \times 10^{12}$      | <sup>1</sup> |
| MA <sub>3</sub> Bi <sub>2</sub> I <sub>9</sub> | 0.01                                       | 400-700         | 0.25                                | 0.8                   | 0.03477                                | 0.03946                              | 0.16                                  | $4.6 \times 10^{12}$      | <sup>1</sup> |
| BI                                             | 100                                        | White Light     | 0.25                                | -                     | 2                                      | 1                                    | $0.5 \times 10^{-3}$                  | $1.30 \times 10^7$        | <sup>2</sup> |
| s-MBI                                          | 100                                        | White Light     | 0.25                                | -                     | 2                                      | 2                                    | $0.1 \times 10^{-3}$                  | $0.61 \times 10^7$        | <sup>2</sup> |
| Ns-MBI                                         | 100                                        | White Light     | 0.25                                | -                     | 3                                      | 2                                    | $0.2 \times 10^{-3}$                  | $0.70 \times 10^7$        | <sup>2</sup> |
| MBI                                            | 100                                        | White Light     | 100                                 | -                     | 0.79                                   | 0.36                                 | $8 \times 10^{-5}$                    | $5 \times 10^8$           | <sup>3</sup> |
| MBI                                            | 1                                          | 382             | 0.25                                | 0                     | -                                      | -                                    | 0.30                                  | $0.9 \times 10^{13}$      | <sup>4</sup> |
| MBIB                                           | 1                                          | 382             | 0.25                                | 0                     | -                                      | -                                    | 0.63                                  | $2 \times 10^{13}$        | <sup>4</sup> |
| MBIC                                           | 1                                          | 382             | 0.25                                | 0                     | 0.46                                   | 0.41                                 | 0.92                                  | $2.9 \times 10^{13}$      | <sup>4</sup> |
| (TMHD)BiBr <sub>5</sub>                        | 0.8                                        | 365-700         | -                                   | 10                    | $9.6 \times 10^{-3}$                   | $10.3 \times 10^{-3}$                | 0.1                                   | -                         | <sup>5</sup> |



## References

- 1 A. A. Hussain, A. K. Rana and M. Ranjan, *Nanoscale*, 2019, **11**, 1217–1227.
- 2 A. Borde, S. Nair, H. Borate, S. Pandharkar, R. Aher, A. Punde, A. Waghmare, P. Shinde, P. Vairale, R. Waykar, V. Doiphode, V. Jadkar, Y. Hase, S. Rondiya, N. Patil, M. Prasad and S. Jadkar, *New Journal of Chemistry*, 2020, **44**, 11282–11290.
- 3 S. Shah, A. Borde, Y. Hase, R. Aher, V. Doiphode, A. Waghmare, A. Punde, P. Shinde, S. Rahane, B. R. Bade, H. M. Pathan, M. Prasad, M. Aleksandrova, S. P. Patole and S. R. Jadkar, *ACS Appl Electron Mater*, 2022, **4**, 2793–2804.
- 4 V.-H. Vuong, S. V. N. Pammi, S. Ippili, V. Jella, T. Nguyen Thi, K. Sairam Pasupuleti, M.-D. Kim, M. Ji Jeong, J.-R. Jeong, H. Sik Chang and S.-G. Yoon, *Chemical Engineering Journal*, 2023, **458**, 141473.
- 5 C. Ji, P. Wang, Z. Wu, Z. Sun, L. Li, J. Zhang, W. Hu, M. Hong and J. Luo, *Adv Funct Mater*, 2018, **28**, 1705467.
